# Supplementary material for: Orthogonal redox and optical stimuli can induce independent responses for catechol-chitosan films
Source: Royal Society of Chemistry journal article supplement (doi:10.1039/d2qm00106c), 2022-01-01
Supplement: d2qm00106c1.pdf [file d2qm00106c1.pdf]

## Supporting Information

### **Orthogonal Redox and Optical Stimuli Can Induce Independent Responses for Catechol-Chitosan Films**

Zhiling Zhao, Eunkyong Kim, Chen-yu Chen, John R. Rzasa, Qian Zhang, Jinyang Li, Yang Tao, William E. Bentley, Jean-Philip Lumb, Bern Kohler, Gregory F. Payne\*

Dr. Zhiling Zhao, Dr. Eunkyong Kim, Prof. William E. Bentley, Prof. Gregory F. Payne

Institute for Bioscience and Biotechnology Research, University of Maryland, College Park, Maryland 20742, USA

Dr. Zhiling Zhao, Dr. Eunkyong Kim, Dr. John R. Rzasa, Prof. William E. Bentley, Prof. Gregory F. Payne

Robert E. Fischell Institute for Biomedical Devices, University of Maryland, College Park, Maryland 20742, USA

Mr. Chen-yu Chen, Dr. Jinyang Li, Prof. Yang Tao, Prof. William E. Bentley

Fischell Department of Bioengineering, University of Maryland, College Park, Maryland 20742, USA

Ms. Qian Zhang

Department of Chemistry and Biochemistry, University of Maryland, College Park, Maryland 20742, USA

Prof. Jean-Philip Lumb

Department of Chemistry, McGill University, Montreal, Quebec H3A 0B8, Canada

Prof. Bern Kohler

Department of Chemistry and Biochemistry, The Ohio State University, Columbus, Ohio 43210, USA

\* Corresponding Author: [gpayne@umd.edu](mailto:gpayne@umd.edu)

The catechol films are fabricated through electrochemical grafting reactions. After the catechol is anodically oxidized at the electrode surface, the oxidation products (e.g., *o*-quinone) are reactive and can undergo grafting reactions with the amine of chitosan. As discussed in our previous reports,<sup>1</sup> the putative products of the grafting reactions might be formed through potential Schiff-base linkages and/or Michael-type adducts (**Fig. S1a**).

**(a) Putative chemistry of (oxidized) catechol grafting reactions**

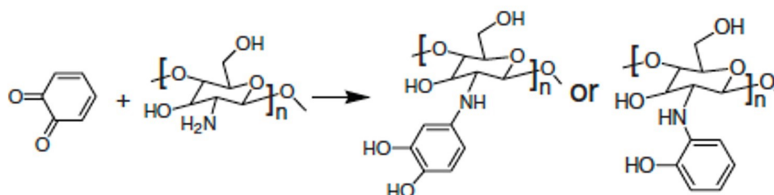

**(b) ATR-IR spectra of catechol region and control**

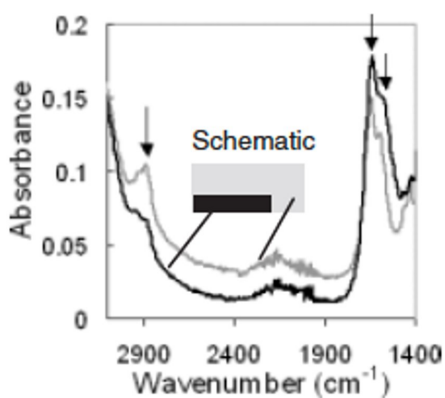

**(c) Electrospray mass spectrum**

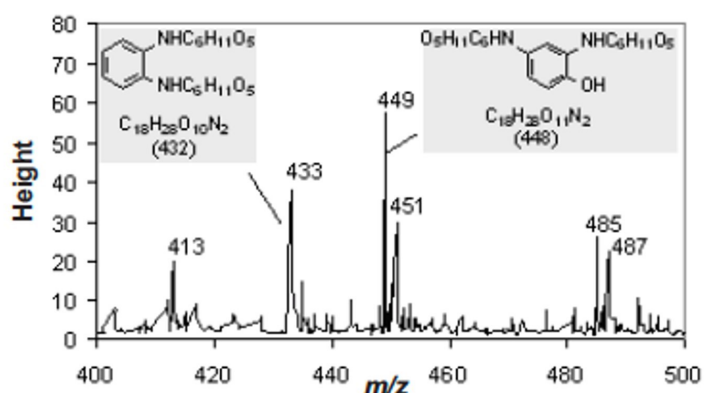

**Fig. S1 Catechol's oxidative grafting to chitosan films and previously reported**

**characterizations.**<sup>1,2</sup> (a) Putative chemistry of catechol's electrochemical grafting reactions. (b) ATR-IR spectra of the catechol patterned region (black square) and un-patterned chitosan region. Reproduced from ref. 2 with permission from John Wiley & Sons, Copyright © 2005 WILEY-VCH Verlag GmbH & Co. KGaA, Weinheim. (c) Electrospray mass spectrum for product solution formed during electrochemical reaction of catechol (0.2 M) and glucosamine (0.4 M)

for 10 min. Reproduced from ref. 1 with permission from John Wiley & Sons, Copyright © 2006 WILEY-VCH Verlag GmbH & Co. KGaA, Weinheim.

This electrochemical grafting mechanism was supported by our previous chemical characterizations using attenuated total reflectance Fourier-transform infrared (ATR-FTIR) spectroscopy<sup>2</sup> and electrospray mass spectrometry<sup>1</sup>. ATR-IR spectra show that (**Fig. S1b**), compared to the un-patterned chitosan region, the catechol patterned region has smaller absorbance in the regions for the stretching vibration of the protonated amine and amine at 2886 and 1593 cm<sup>-1</sup>, which suggests that the oxidation products of catechol undergo covalent bond formation with amine group of chitosan.<sup>2</sup> For additional chemical evidence, electrospray mass spectrometry (**Fig. S1c**) was used to analyze the product formed through the reaction between electrochemically oxidized catechol and glucosamine (a monomeric unit of chitosan).<sup>1</sup> Two putative products are shown in **Fig. S1c** for peaks observed at  $m/z$  433 and 449, and it suggests that the catechol films are probably formed through Schiff-base linkages and/or Michael-type adducts.<sup>1</sup>

(a) Control hydrogel on glass slide

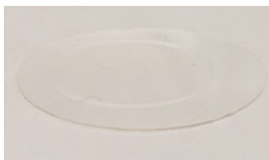

(b) Maximum temperatures of thermograms

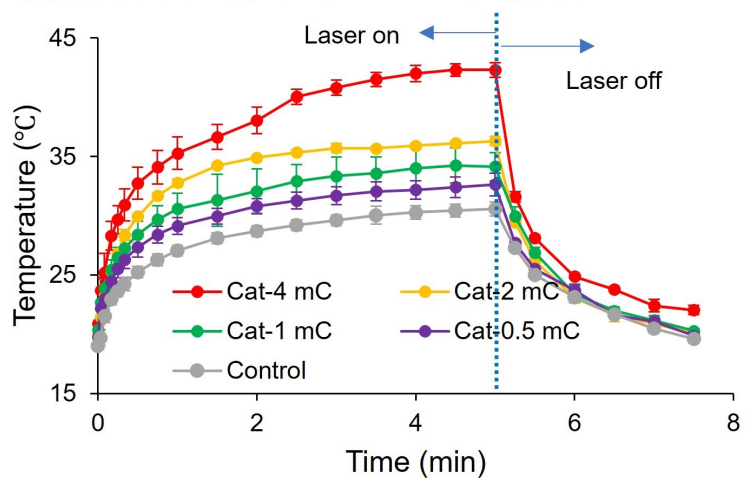

(c) Thermograms after 5 minutes irradiation

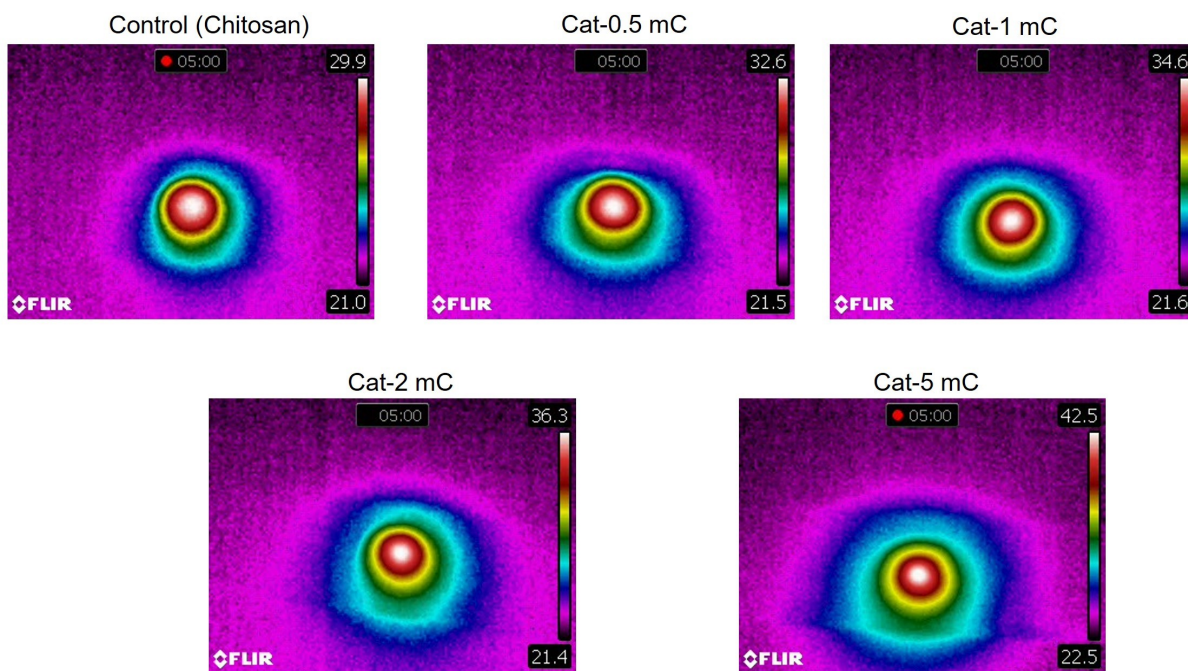

**Fig. S2 Photothermal properties of patterned catechol films.** (a) Optical image of hydrogel on a  $\sim 150 \mu\text{m}$  thick glass slide. (b) The maximum temperatures of the patterned regions were recorded during and after irradiation (808 nm;  $0.75 \text{ W/cm}^2$ ; data represent mean values  $\pm \text{SD}$  ( $n=3$ )). (c) Thermograms of the irradiated samples, temperature is in unit of  $^{\circ}\text{C}$ .

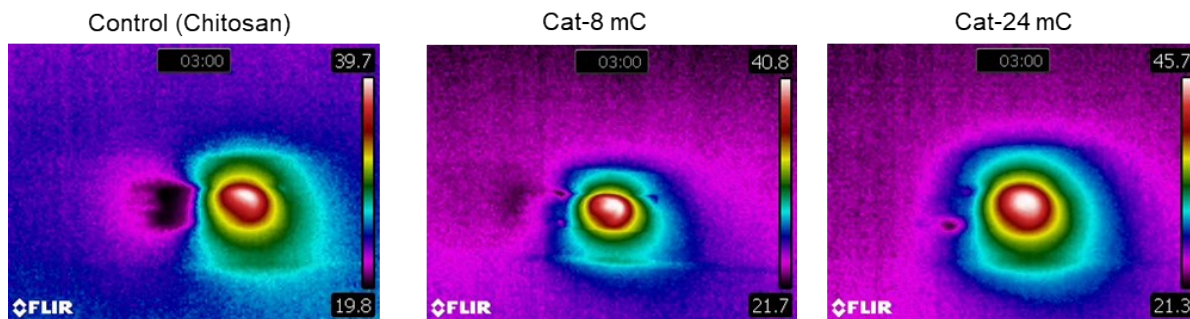

**Fig. S3** Thermograms of catechol-chitosan coated electrodes after 3 minutes irradiation, temperature is in unit of °C.

**(a) Output charge for films stimulated by NIR irradiation**

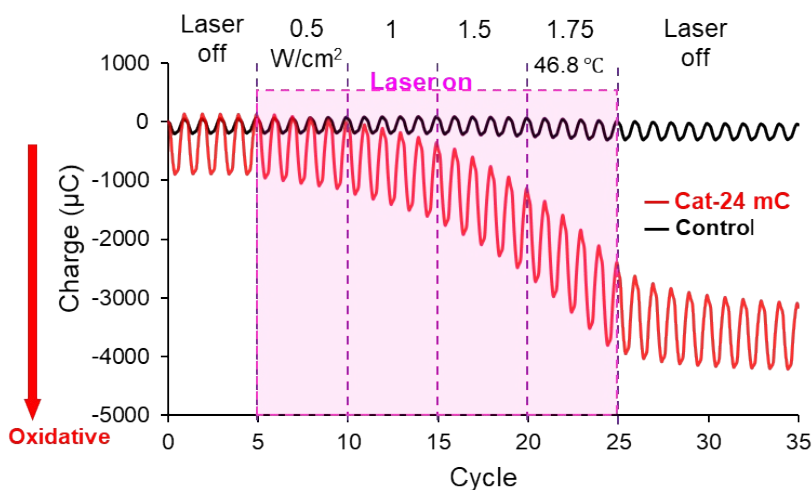

**(b) Output charge for a heated film (Cat-24 mC)**

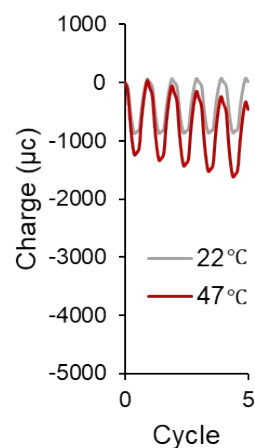

**Fig. S4** (a) Times-series data of the output charge ( $Q = \int i dt$ ) responses by integrating current output in **Fig. 3d**. Without irradiation, the output charge oscillates within each cycle without showing a net trend indicating that oxidation and reduction are balanced. With irradiation, there is a trend toward a net oxidative charge transfer. (b) When redox probing was performed at elevated temperature (47 °C) in the absence of irradiation (**Fig. 4b**), the output  $Q$  also has a trend toward net oxidative (vs. redox-probing at lower temperature). All measurements were

performed with an electrode coated with either a chitosan film (control) or a catechol (24 mC)-chitosan film.

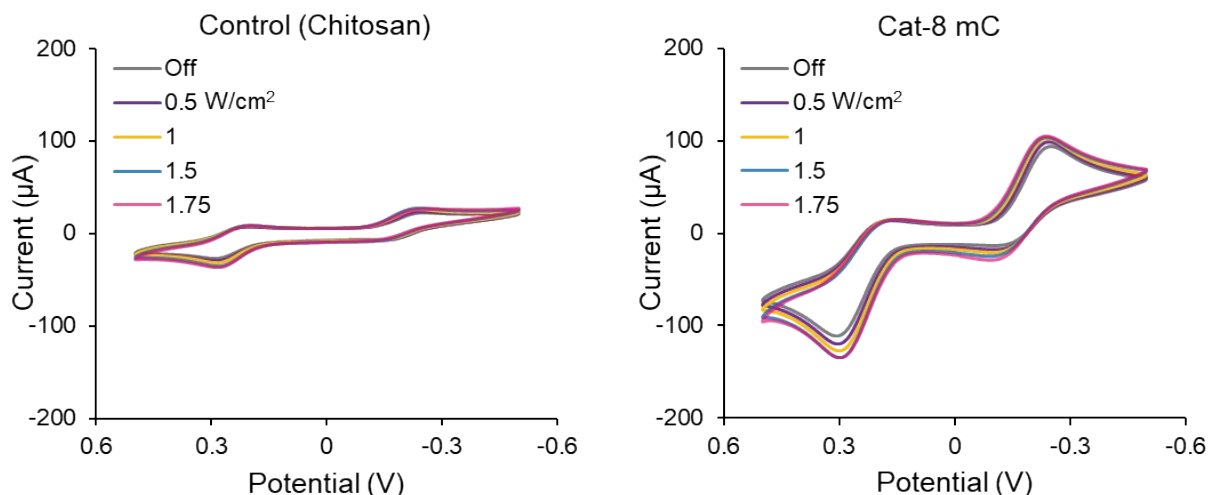

**Fig. S5** Cyclic voltammograms of electrodes coated with either the control chitosan film or the catechol-chitosan (Cat-8 mC) film that were simultaneously stimulated by redox-probing and NIR-irradiation (808 nm). Solution: 1 mM  $\text{Ru}(\text{NH}_3)_6\text{Cl}_3$  and 1 mM 1,1-Ferrocenedimethanol in 0.1 M phosphate buffer.

## References

- (1) Wu, L.-Q.; McDermott, M. K.; Zhu, C.; Ghodssi, R.; Payne, G. F.; M. K., M.; C., Z.; R., G.; G. F., P. Mimicking Biological Phenol Reaction Cascades to Confer Mechanical Function. *Adv. Funct. Mater.* **2006**, *16* (15), 1967–1974. <https://doi.org/10.1002/adfm.200500792>.
- (2) Wu, L. Q.; Ghodssi, R.; Elabd, Y. A.; Payne, G. F. Biomimetic Pattern Transfer. *Adv. Funct. Mater.* **2005**, *15* (2), 189–195. <https://doi.org/10.1002/adfm.200400279>.
